# Supplementary material
Source: Frontiers journal article supplement (https://www.frontiersin.org/articles/258065)
Supplement: Image_3.PDF [file Image_3.PDF]

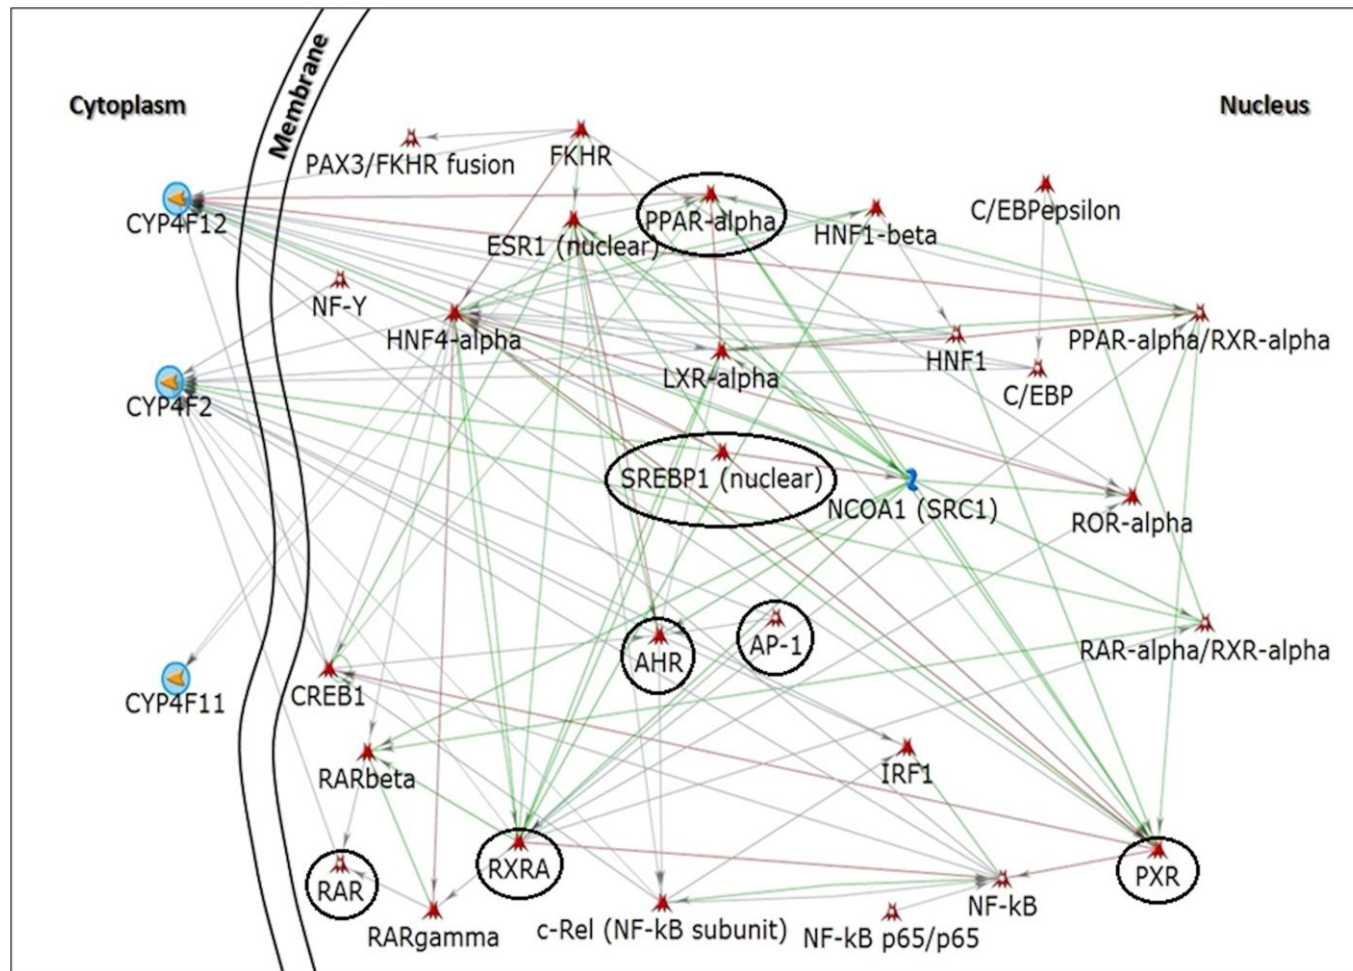

**Supplementary Figure 3. GeneGo graphic illustrating the interaction of nuclear factors with *CYP4F2*, *CYP4F11* and *CYP4F12* genes.** Each connection represents a direct, experimentally confirmed, physical interaction between the objects.
